# Supplementary material for: Authentication ofPanax ginsengfrom different regions
Source: Royal Society of Chemistry journal article supplement (doi:10.1039/c7ra09537f), 2017-01-01
Supplement: c7ra09537f1.pdf [file c7ra09537f1.pdf]

1 **Supplementary information**

2 **Authentication of *Panax ginseng* from different regions**

3 **Juxin YIN<sup>1,2</sup>, Liwu WANG<sup>1</sup>, Yi HUANG<sup>1</sup>, Ying MU<sup>2</sup>, Shaowu LV<sup>1\*</sup>**

4 <sup>1</sup>College of Life Science, Key Laboratory for Molecular Enzymology and Engineering of the  
5 Ministry of Education, Jilin University, Changchun 130000, China

6 <sup>2</sup>Research Center for Analytical Instrumentation, Institute of Cyber-Systems and Control, State  
7 Key Laboratory of Industrial Control Technology, Zhejiang University, Hangzhou 310000, China.

8 \*Corresponding author:

9 Shaowu LV

10 College of Life Science

11 Key Laboratory for Molecular Enzymology and Engineering of the Ministry of Education

12 Jilin University

13 Changchun 130000

14 Jilin

15 China

16 E-mail: lvsw@jlu.edu.cn

17

18

19

20

21

22

23

24

25

26

27 **The expression of key enzymes**

28 The primers of key genes were in Table S1. The gene expression of fresh ginseng from different  
 29 regions was treated with the formula  $2^{-\Delta\Delta Ct}$ . The result was displayed in Figure S1.

30

**Table S1. The gene primers of the key enzymes**

|        | Genebank ID | Forward primer                  | Reverse primer                  |
|--------|-------------|---------------------------------|---------------------------------|
| HMGR   | GQ455990    | 5'-ATGGTGTCCAAGGGTGTTCAG-3'     | 5'-CTTTCCTCGCCCTTCAATCC-3'      |
| FPS    | DQ087959    | 5'-ACCCTGTTGGTTCAGATTACCTAAG-3' | 5'-ATCCAACAGATCCACATAGTAAGGC-3' |
| SS     | AB010148    | 5'-TTGGAAGCGTTACCAGGAG-3'       | 5'-GAGGCATGGAAGAGCTTTGAC-3'     |
| SE     | AB122078    | 5'-CATTAGAACCATGCCAAACAGAA-3'   | 5'-TGGCGCATATTGAAAGCATC-3'      |
| DS     | GU183405    | 5'-CAGCGGAACGATTGACACTATTC-3'   | 5'-ATCGTGCTGTGCCCTCAAT-3'       |
| GT     | KM491309    | 5'-GGCATCGCTTCTTGTGGTCC-3'      | 5'-GCCCATCCAATCACTTTTCC-3'      |
| CYP450 | AB122079    | 5'-AGATGCCGTTGTCCGAGTTG-3'      | 5'-CGCAACAGGGTGTAGCCTTA-3'      |

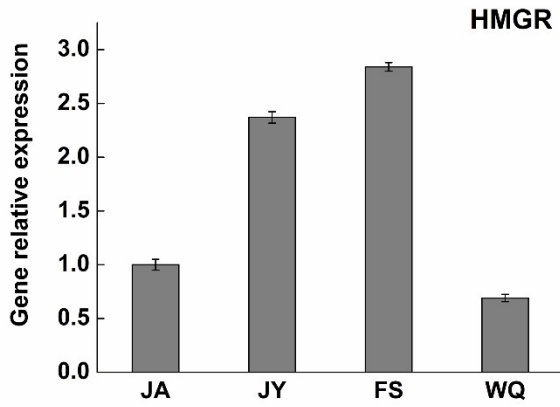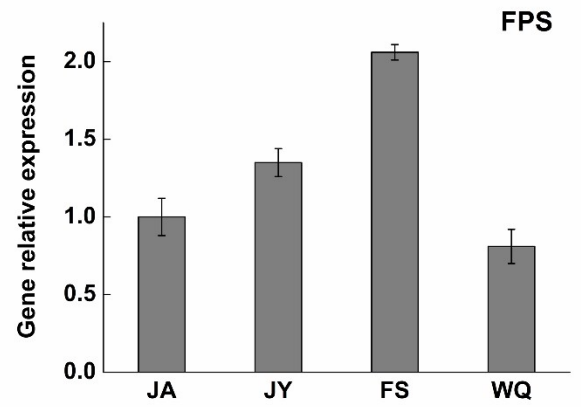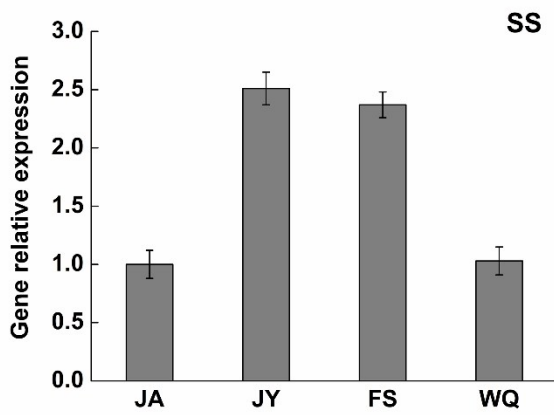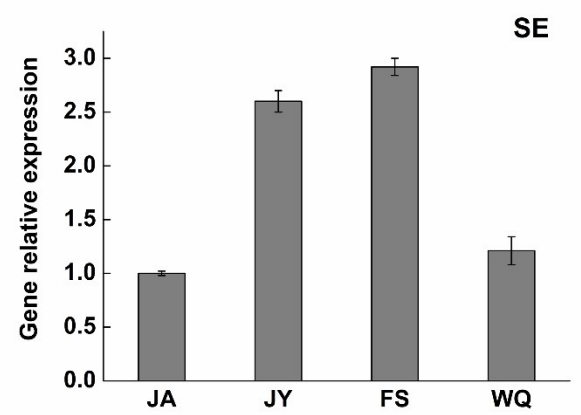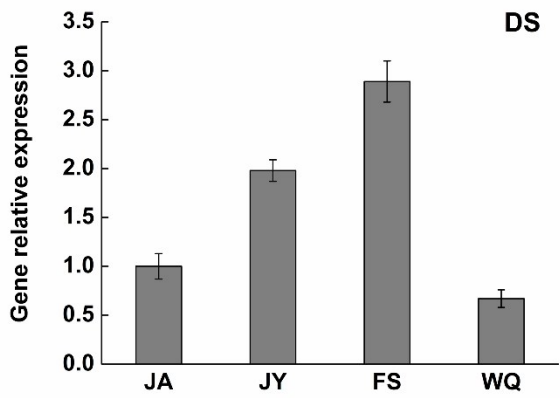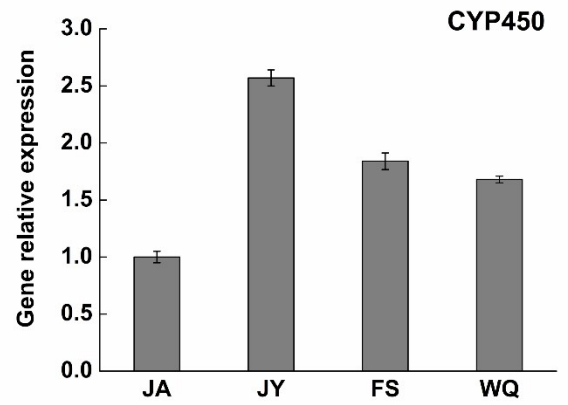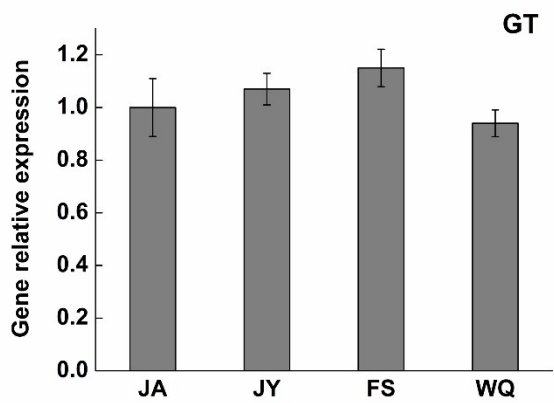

32 **Fig S1** | Gene expression of key enzymes in ginseng from different regions (the JA region was  
33 the control group, n = 8)

34

35 **The activity of key enzymes**

36 The activity of key enzyme in fresh ginseng from different regions was measured by different  
37 methods. In order to compare the different regions, we used the JA region as the control and the  
38 data was normalized. The result was displayed in Figure S2.

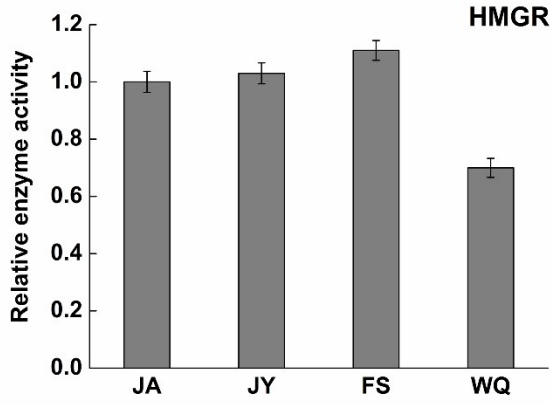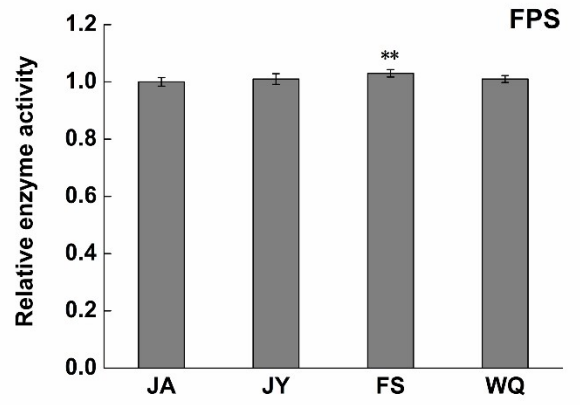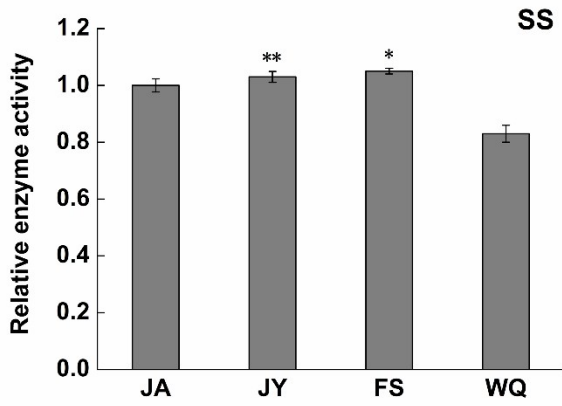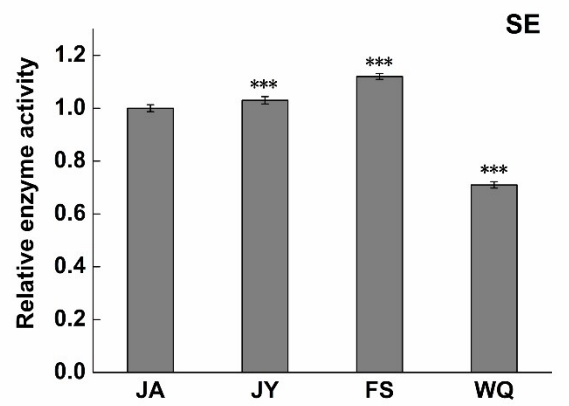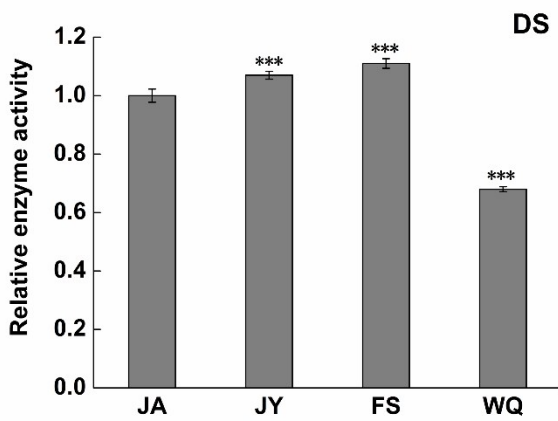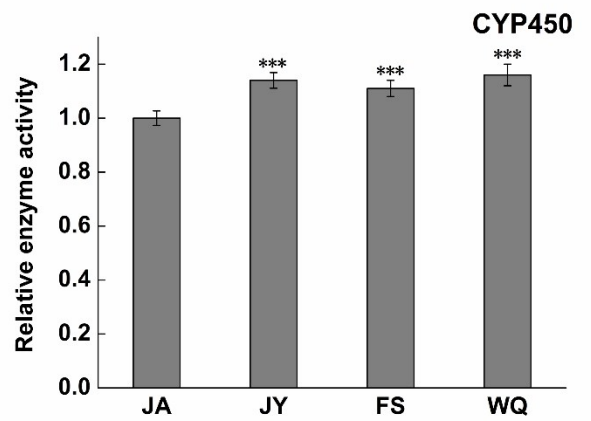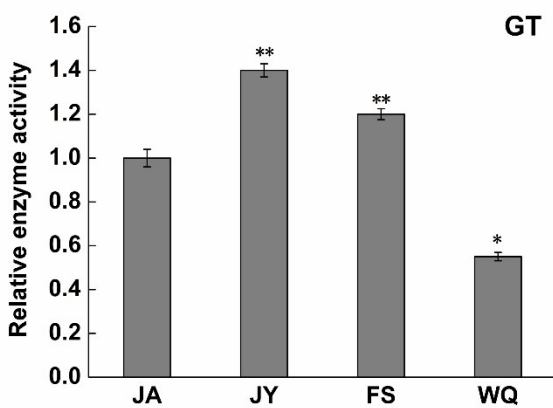

40 **Fig S2** | Enzyme activity in fresh ginseng from different regions (the JA region was the control  
41 group (Enzyme activity at 2 years of growth was the control group, n=8 ginseng.)
